# Supplementary material for: Enhanced internal ionic interaction of MFS efflux pump MdfA contributes to its elevated antibiotic export
Source: Royal Society of Chemistry journal article supplement (doi:10.1039/d2cp05059e), 2022-12-01
Supplement: d2cp05059e1.pdf [file d2cp05059e1.pdf]

Supplemental Table 1. Primers used in this work.

| Name    | Sequence (5'-3')                                             |
|---------|--------------------------------------------------------------|
| MdfA-F  | gactggtggacagcaaatgggtcgcggatccgaattcgagatgcaaaataaattagcttc |
| MdfA-R  | gtggtggtgctcgagtgcgccgcaagcttgcgacggagttacccttcgtgagaatttc   |
| E136D-F | ttcaggaatccttcaagacgcggtttgatcaagatcac                       |
| E136D-R | gtgatcttgatacaaaccgctcttcaaggattcctgaa                       |
| A137E-F | caggaatccttcaagaggaggttgatcaagatcaccg                        |
| A137E-R | cggtgatcttgatacaaaccctcttcaaggattcctg                        |
| G50D-F  | acaatatcaggcggacattgattgggtcctacttcaatg                      |
| G50D-R  | cattgaagtaggaacccaatcaatgtccgctgatattgt                      |
| E135D-F | attcaggaatccttcgacgaggcggttgatc                              |
| E135D-R | gatacaaaccgctcgtcgaaggattcctgaat                             |
| S368R-F | tcggtattgaaatcagaaaacatgcctggct                              |
| S368R-R | agccaggcatgtttctgattcaataccga                                |
| W372R-F | aatcagcaaacatgcccggctgaacgggggc                              |
| F       |                                                              |
| W372R-R | gccccggtcagccgggcatgttgctgatt                                |
| R       |                                                              |
| L339R-F | tggcgcgattaacccggttgccagcgata                                |
| L339R-R | tatcgctggcaaaccgggtaatcgcacca                                |
| G333R-F | ggtctggcgaatgcgagactggtgcgatta                               |
| G333R-R | taatcgaccagtctcgattcgccagacc                                 |
| K346R-F | gccagcgatatgagtagaggtacggtttctgc                             |
| K346R-R | gcagaaaccgtaccttactcatatcgctggc                              |
| K369R-F | tattgaaatcagcagacatgcctggctg                                 |
| K369R-R | cagccaggcatgtctgctgattcaata                                  |
| E136R-F | aattcaggaatccttcaagggcggttgatcaagat                          |
| E136R-R | atcttgatacaaaccgcccttcaaggattcctgaatt                        |

Supplemental Table 2. Detailed information of the natural variations of MdfA across *E. coli* isolates.

| Variation | Accession   |              |            |              |  |
|-----------|-------------|--------------|------------|--------------|--|
| G50D      | WP_1697519  | EFA6854405.1 |            |              |  |
|           | 78.1        |              |            |              |  |
| E135D     | HCJ5848385. |              |            |              |  |
|           | 1           |              |            |              |  |
| E136D     | MXH51204.1  | WP_257160858 | EFA7074832 |              |  |
|           |             | .1           | .1         |              |  |
| A137E     | EEV1120356. |              |            |              |  |
|           | 1           |              |            |              |  |
| S368R     | WP_0968513  | WP_137536365 |            |              |  |
|           | 24.1        | .1           |            |              |  |
| W372R     | WP_0973455  | EFG3719515.1 | QKV15594.1 | WP_032300665 |  |
|           | 30.1        |              |            | .1           |  |
| L339R     | MCN8686451  |              |            |              |  |
|           | .1          |              |            |              |  |
| G333R     | MBF5229523. |              |            |              |  |
|           | 1           |              |            |              |  |

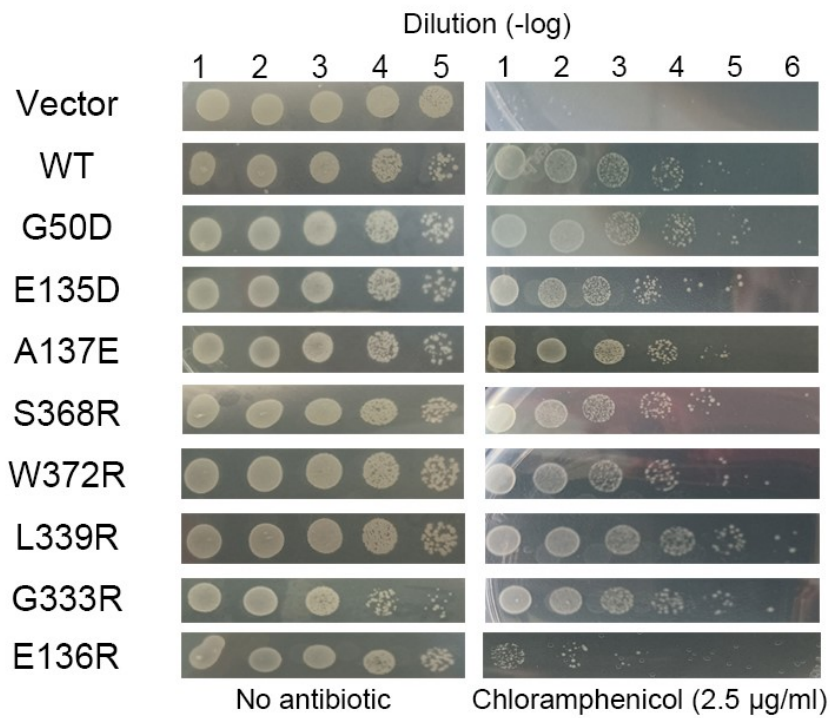

Figure S1. Chloramphenicol resistance levels of the other MdfA variants were not changed. Chloramphenicol resistance assay of the *E. coli* strains. Cultivations of the strains were 10-folds diluted and plated on solid LB medium containing 2.5 µg/ml chloramphenicol.

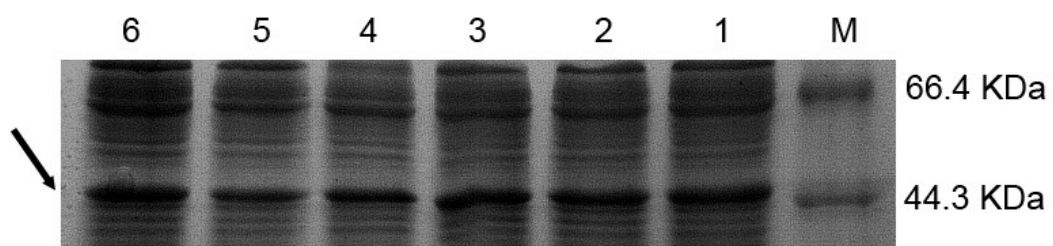

Figure S2. SDS-PAGE analysis of the recombinant *E. coli* strains. SDS-PAGE

samples were harvested at the cultivation of 12 h. M: Protein maker (TAKARA premix marker low molecule weight, 3595Q). Lane 1 to Lane 6: MdfA, MdfA<sup>E136D</sup>, MdfA<sup>E136D-K346R</sup>, MdfA<sup>K346R</sup>, MdfA<sup>K369R</sup>, MdfA<sup>W372R</sup>. Arrow indicated the position of MdfA and variants (45 KDa).

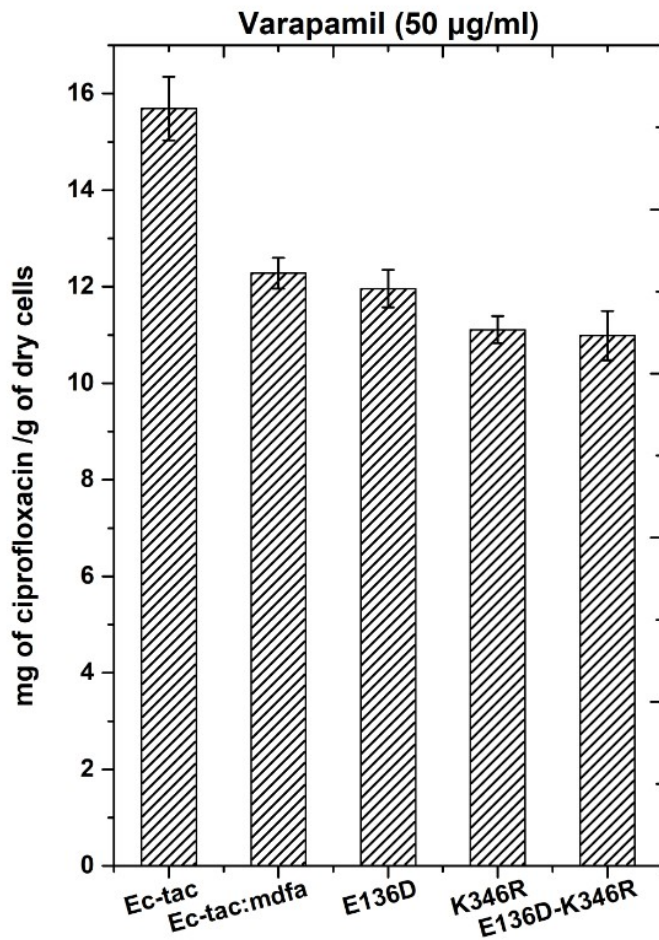

Figure S3. Intracellular ciprofloxacin concentrations were reversed by verapamil.

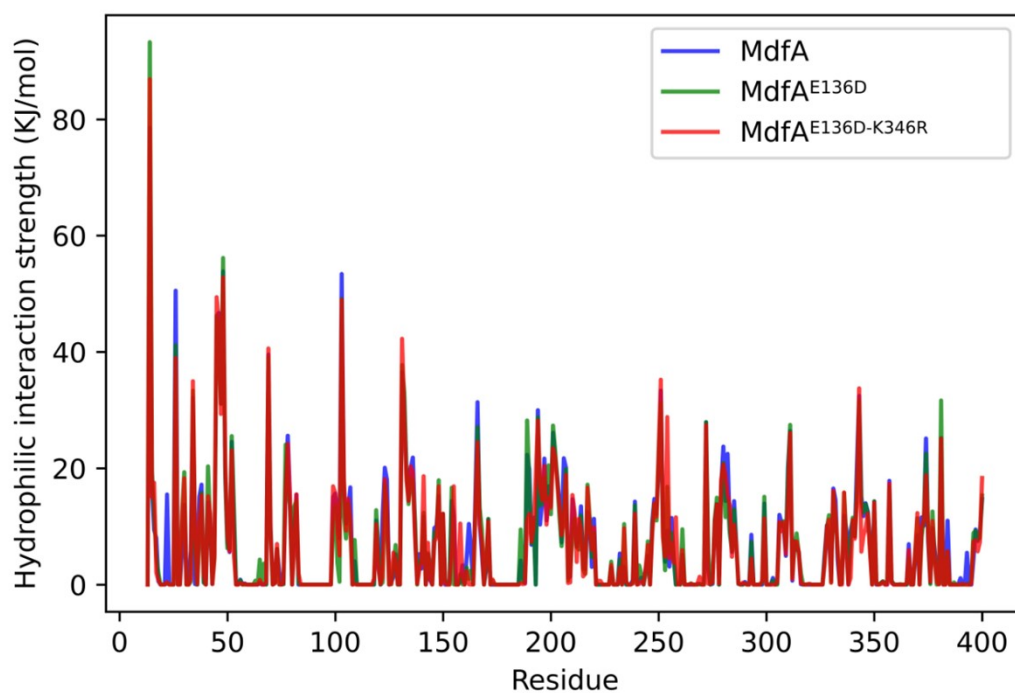

Figure S4. Detailed data of MdfA's hydrophilic interactions with water at the inward-facing conformations. Hydrophilic interactions were calculated with the built-in function of YASARA software suit.

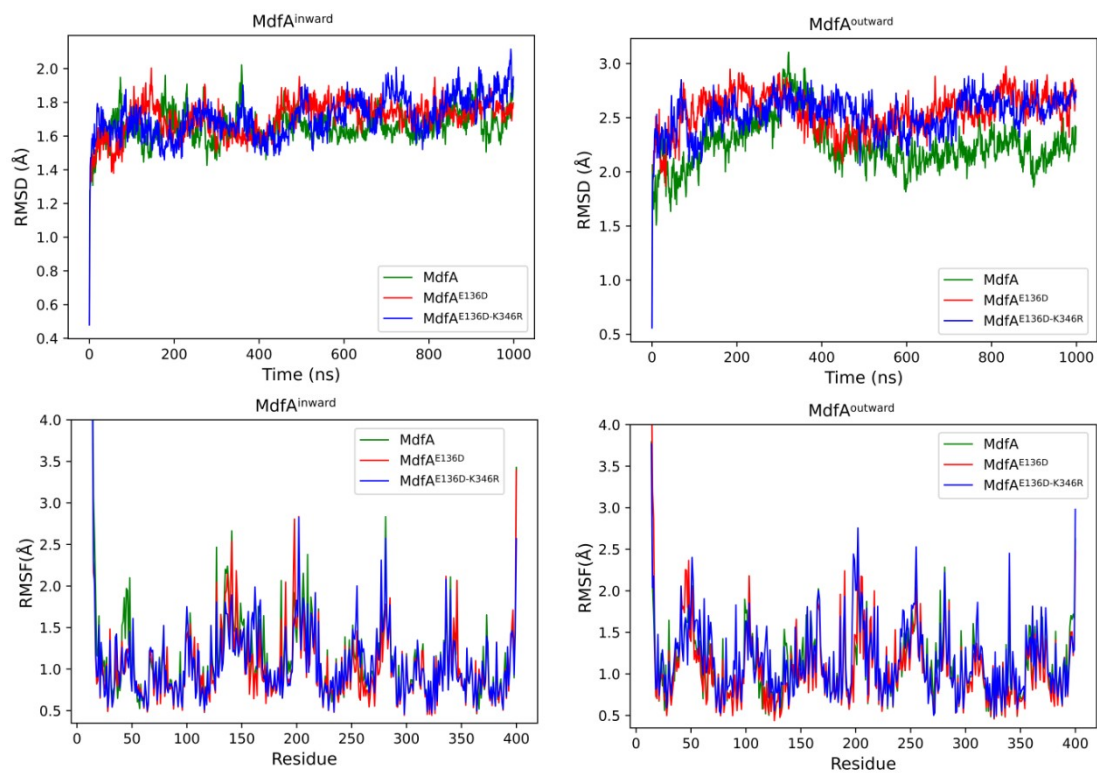

Figure S5. Flexibilities of MdfA's variants were not reduced compared to wild type MdfA. RMSD and RMSF were used to elucidate the total and local flexibilities of the protein, respectively.
